# Supplementary material for: Hesitancy in COVID-19 Vaccine Uptake and Its Correlated Factors Using Multi-Theory Model among Adult Women: A Cross-Sectional Study in Three States of Somalia
Source: MDPI journal article supplement (doi:10.3390/vaccines11091489), 2023-09-14
Supplement: s1 [file s1]

## Supplementary Material

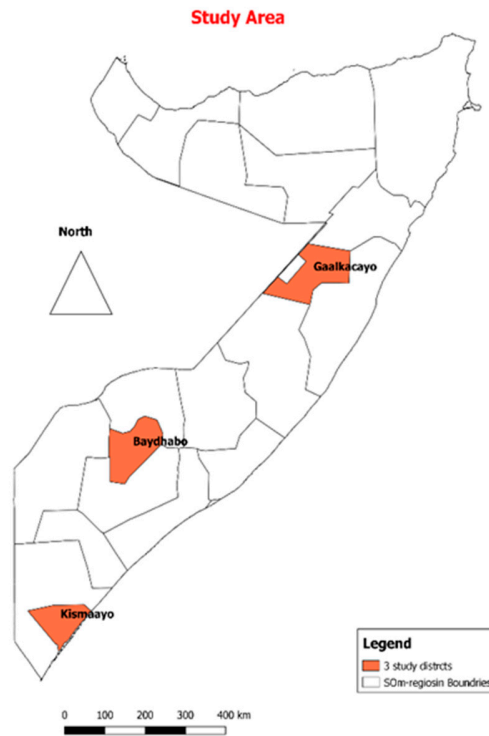

**Figure S1.** Study location: Baidao, Kismayo, and Galkayo districts in Somalia.

**Table S1.** Sampled respondents.

| State                 | Region (district)     | Villages             | IDPs or Host Co | Target Population | Respondents |
|-----------------------|-----------------------|----------------------|-----------------|-------------------|-------------|
| Southwest State       | Bay (Baidao)          | Isha                 | Host Co         | 89                | 77          |
|                       |                       | Berdaale             | Host Co         | 89                | 77          |
|                       |                       | Horseed              | Host Co         | 89                | 77          |
|                       |                       | Hanano 2 IDP         | IDP             | 59                | 51          |
|                       |                       | Iljanayo IDP         | IDP             | 59                | 51          |
| Puntland State        | Mudug (Galkayo)       | New Garsoor laanta 4 | Host Co         | 89                | 77          |
|                       |                       | Siinay               | Host Co         | 89                | 77          |
|                       |                       | Israc Buulo-dooro    | Host Co         | 89                | 77          |
|                       |                       | Ayax IDP             | IDP             | 59                | 51          |
|                       |                       | Liban 1 and 2        | IDP             | 59                | 51          |
| Jubbaland State       | Lower Jubba (Kismayo) | Farjano              | Host Co         | 89                | 77          |
|                       |                       | Midnimo              | Host Co         | 89                | 77          |
|                       |                       | Guulwade             | Host Co         | 89                | 77          |
|                       |                       | Galbeed IDPs         | IDP             | 59                | 51          |
|                       |                       | Fanole IDPs          | IDP             | 59                | 51          |
| Total                 |                       |                      |                 | 1155              | 999         |
| Response rate = 86.5% |                       |                      |                 |                   |             |

**Table S2: Response Rate Calculation**

| Response Rate calculation |                                  |     |
|---------------------------|----------------------------------|-----|
| I                         | Complete interview               | 999 |
| P                         | Partial interview                | 81  |
| R                         | Refusal and break-off            | 47  |
| NC                        | non-contact                      | 9   |
| O                         | Other                            | 12  |
| UH                        | Unknown if household/occupied HU | 1   |
| UO                        | Unknown, other                   | 6   |
| Total                     |                                  | 156 |

$$RR=999/ (999+81+47+9+12+1+6) = 86.5\%.$$

#### Response Rate Calculation

The **response rate (RR)** is the number of complete interviews with reporting units divided by the number of eligible reporting units in the sample (Montgomery, Dennis, & Ganesh, 2016).

The **non-response** rate is defined as the percentage of all potentially eligible units (or elements) that do not have responses to at least a certain proportion of the items in a survey questionnaire (Shaw, Bednall, & Hall, 2002).

The following formula was used to calculate the response rate.

$$RR1 = \frac{I}{(I + P) + (R + NC + O) + (UH + UO)}$$

Where, RR1 = Response rate

I = Complete interview

P = Partial interview

R = Refusal and break-off

NC = non-contact

O = Other

UH = Unknown if household/occupied HU

UO = Unknown, other

The details of these quantities for our study are given in the following:

I and P=The in-person household survey was conducted in which housing units are sampled from an address-based sampling frame of 15 selected villages using systematic sampling technique. We consider less than 50% of all applicable questions answered (with other than a refusal or no answer) equals break-off, 50%-80% equals partial, and more that 80% equals complete. We found complete answered from 999 participants (i.e., I=999). We found 81 of the participants did not complete the questionnaire (i.e., P=81).

R= Refusals and breakoffs consist of cases in which some contact has been made with the housing unit and a responsible household member has

declined to do the interview, or an initiated interview results in a terminal break-off (i.e., R=47).

NC= non-contacts in in-person household surveys consist of three types: a) unable to gain access to the building, b) no one reached at housing unit, and c) respondent away or unavailable (i.e., NC=9).

O= Other cases represent instances in which the respondent is/was eligible and did not refuse the interview, but no interview is obtainable because of a) the respondent is physically and/or mentally unable to do an interview; b) miscellaneous other reasons. We did not face any language problem to exclude participants. (i.e., O=12).

UH= Cases of unknown eligibility and no interview include situations in which it is not known if an eligible housing unit exists and those in which a housing unit exists (i.e., UH=1).

UO= Not eligible cases for in-person household surveys include a) out-of-sample housing units; b) not-a-housing unit; c) vacant housing units; d) housing units with no eligible respondent; and e) situations in which quotas have been filled. In a systematic sampling technique, we found a total of 6 households without any adult respondents during the interview (UO=6).

Thus, the response rate is,  $RR=999/(999+81+47+9+12+1+6) = 86.5\%$

**Table S3.** multi-nominal logit analysis of determinants of intention to receive vaccine, undecided used as base category.

|                    | Intended to receive the vaccine |              |               |              | Not intended to receive the vaccine |       |        |       |
|--------------------|---------------------------------|--------------|---------------|--------------|-------------------------------------|-------|--------|-------|
|                    | Coeff.                          | Std.         | z             | P>z          | Coeff.                              | Std.  | z      | P>z   |
| Household head     |                                 |              |               |              |                                     |       |        |       |
| Female (and...)    | 0.383                           | 0.267        | -1.380        | 0.168        | 0.443                               | 0.441 | -0.820 | 0.413 |
| Education          | 0.263                           | 0.182        | -1.930        | 0.054        | 0.679                               | 0.665 | -0.390 | 0.693 |
| Informal education | 0.384                           | 0.262        | -1.400        | 0.161        | 0.945                               | 0.919 | -0.060 | 0.953 |
| No education       | 0.641                           | 0.449        | -0.640        | 0.525        | 1.031                               | 1.034 | 0.030  | 0.976 |
| Primary            |                                 |              |               |              |                                     |       |        |       |
| Secondary          | 0.377                           | 0.082        | -4.460        | 0.000        | 0.619                               | 0.186 | -1.600 | 0.110 |
| Income category    | 0.299                           | 0.079        | -4.540        | 0.000        | 0.518                               | 0.194 | -1.760 | 0.079 |
| \$50-150           | 0.327                           | 0.140        | -2.620        | 0.009        | 1.305                               | 0.693 | 0.500  | 0.615 |
| \$150-250          | 0.202                           | 0.108        | -3.000        | 0.003        | 1.930                               | 1.185 | 1.070  | 0.285 |
| \$250-350          |                                 |              |               |              |                                     |       |        |       |
| Above \$350        | 1.389                           | 0.394        | 1.160         | 0.246        | 1.874                               | 0.844 | 1.390  | 0.163 |
| Marital status     | 0.466                           | 0.197        | -1.810        | 0.071        | 0.698                               | 0.397 | -0.630 | 0.527 |
| Married            | 0.913                           | 0.297        | -0.280        | 0.781        | 2.109                               | 0.993 | 1.590  | 0.113 |
| Single             | 1.023                           | 0.032        | 0.740         | 0.461        | 0.923                               | 0.040 | -1.860 | 0.062 |
| Widowed            |                                 |              |               |              |                                     |       |        |       |
| Number of children | 1.457                           | 0.293        | 1.870         | 0.061        | 1.053                               | 0.319 | 0.170  | 0.864 |
| Type of residence  |                                 |              |               |              |                                     |       |        |       |
| IDP                | <b>0.380</b>                    | <b>0.090</b> | <b>-4.080</b> | <b>0.000</b> | 0.600                               | 0.218 | -1.400 | 0.160 |
| District           | <b>0.220</b>                    | <b>0.049</b> | <b>-6.760</b> | <b>0.000</b> | 0.318                               | 0.093 | -3.930 | 0.000 |
| Galkayo            | <b>5.305</b>                    | <b>1.122</b> | <b>7.890</b>  | <b>0.000</b> | 0.336                               | 0.104 | -3.520 | 0.000 |
| Kismayo            |                                 |              |               |              |                                     |       |        |       |

|                                             |       |       |        |       |       |       |        |       |
|---------------------------------------------|-------|-------|--------|-------|-------|-------|--------|-------|
| Trust in covid-19 vaccine                   | 1.045 | 0.182 | 0.250  | 0.800 | 1.340 | 0.326 | 1.200  | 0.229 |
| Previously took vaccine for other disease   |       |       |        |       |       |       |        |       |
| No                                          | 1.039 | 0.257 | 0.150  | 0.877 | 1.325 | 0.489 | 0.760  | 0.446 |
| Status                                      | 1.183 | 0.290 | 0.680  | 0.494 | 1.569 | 0.547 | 1.290  | 0.196 |
| Lactating                                   | 0.731 | 0.215 | -1.060 | 0.288 | 1.920 | 0.795 | 1.570  | 0.115 |
| None                                        |       |       |        |       |       |       |        |       |
| Pregnant                                    | 0.976 | 0.174 | -0.140 | 0.891 | 1.181 | 0.307 | 0.640  | 0.522 |
| Heard of bad information about vaccine      |       |       |        |       |       |       |        |       |
| Yes                                         | 1.102 | 0.198 | 0.540  | 0.591 | 1.371 | 0.345 | 1.250  | 0.210 |
| Do you know anyone vaccinated               |       |       |        |       |       |       |        |       |
| Yes                                         | 1.905 | 0.405 | 3.030  | 0.002 | 0.948 | 0.250 | -0.200 | 0.838 |
| Do you have information about vaccine       | 1.341 | 0.290 | 1.360  | 0.175 | 0.471 | 0.127 | -2.800 | 0.005 |
| b. Yes,                                     | 0.992 | 0.846 | -0.010 | 0.993 | 0.615 | 0.731 | -0.410 | 0.682 |
| Do you trust your healthcare provider (yes) | 0.383 | 0.267 | -1.380 | 0.168 | 0.443 | 0.441 | -0.820 | 0.413 |
| _cons                                       | 0.263 | 0.182 | -1.930 | 0.054 | 0.679 | 0.665 | -0.390 | 0.693 |

#### Reference:

- Montgomery, R., Dennis, J. M., & Ganesh, N. (2016). Response rate calculation methodology for recruitment of a two-phase probability-based panel: The case of AmeriSpeak. *University of Chicago National Opinion Research Center white Paper*.
- Shaw, M., Bednall, D., & Hall, J. (2002). A proposal for a comprehensive response-rate measure (CRRM) for survey research. *Journal of Marketing Management*, 18(5-6), 533-554.
